# Supplementary material for: Sterilization effects of UV laser irradiation onBacillus atrophaeusspore viability, structure, and proteins
Source: Royal Society of Chemistry journal article supplement (doi:10.1039/d1an01717a), 2021-01-01

## SUPPORTING INFORMATION

**Supplementary Figure S1:** MALDI-FT-ICR comparison of experimental (blue) and isotope simulated (red) mass spectra of 24 identified *Bacillus atrophaeus* spore proteins

### (1) Hypothetical protein DX926\_04085

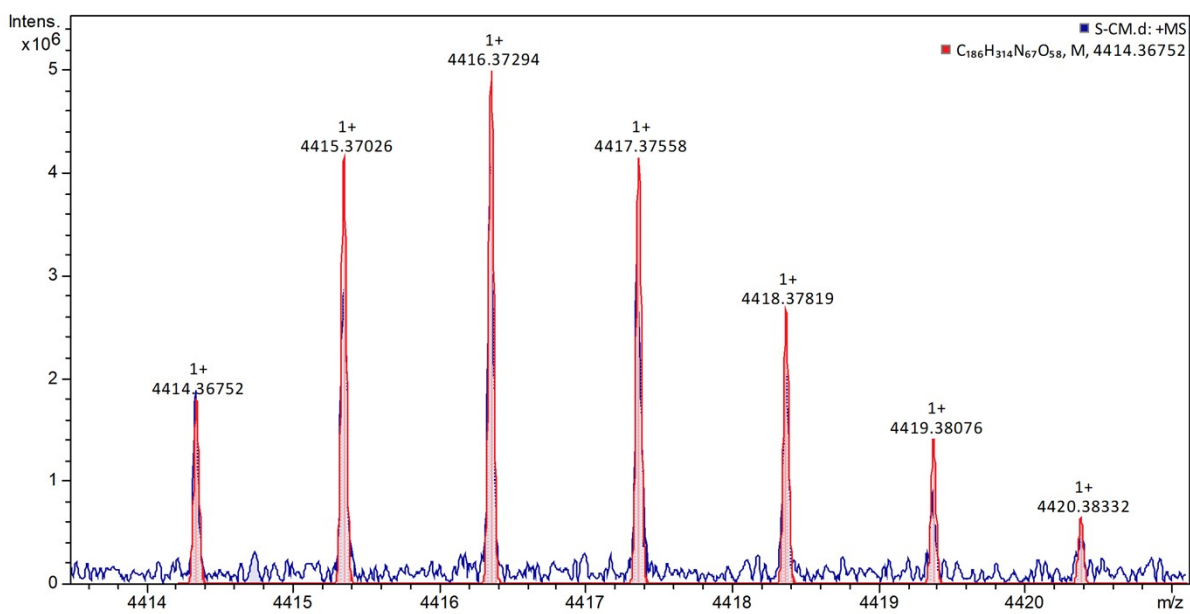

### (2) Small, acid-soluble spore protein L

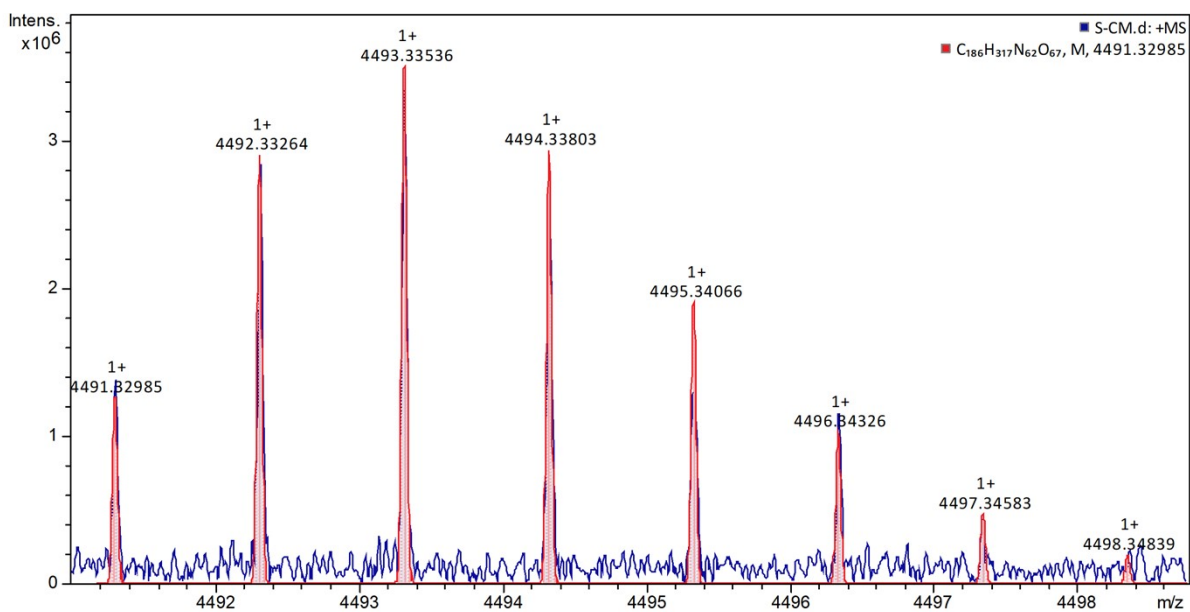

### (3) YpzI family protein

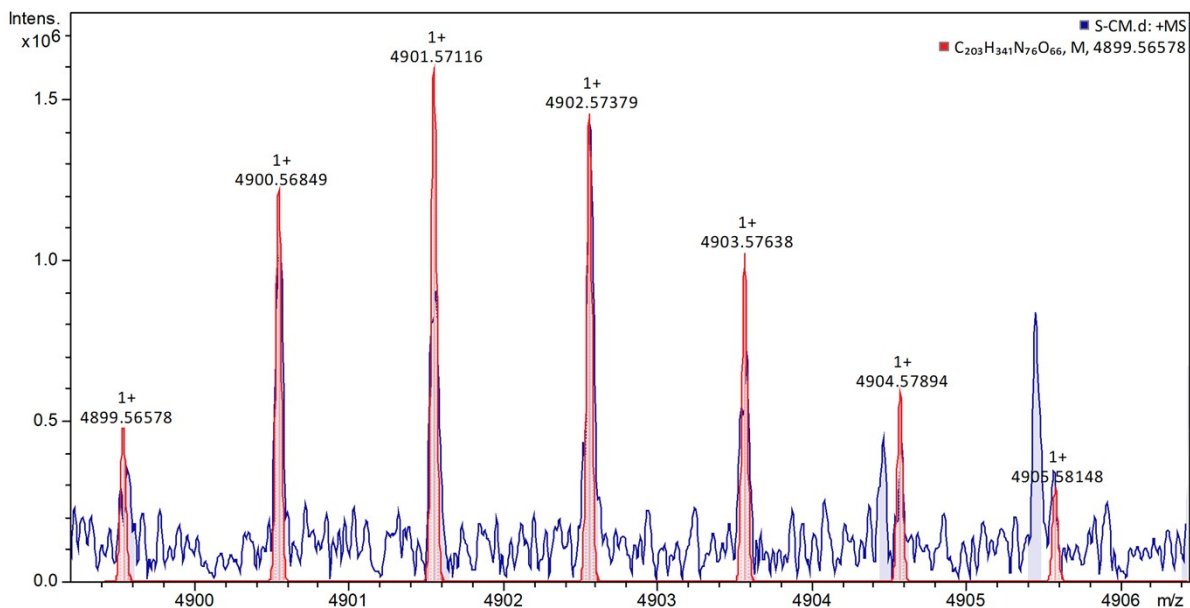

### (4) YuzL family protein

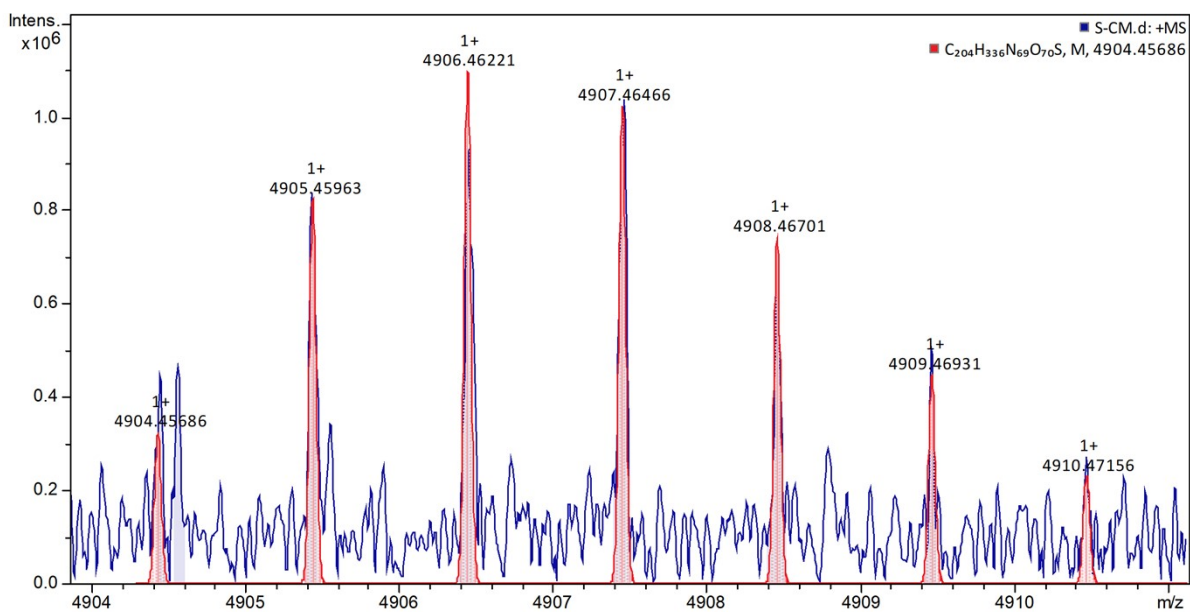

(5) Small, acid-soluble spore protein J

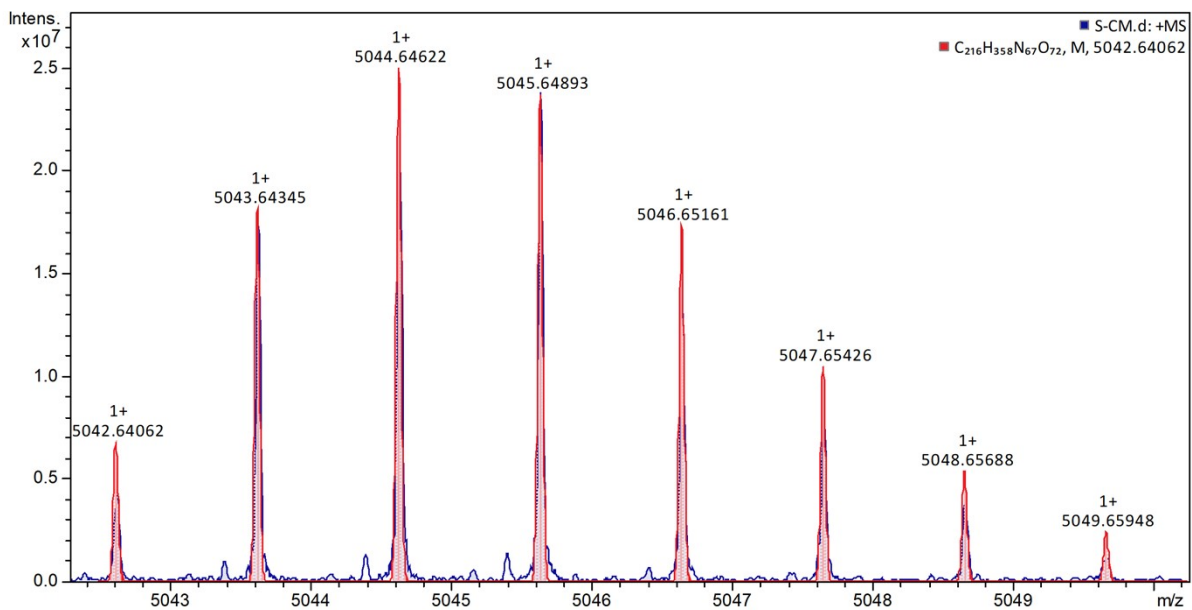

(6) Hypothetical protein B4144\_3326

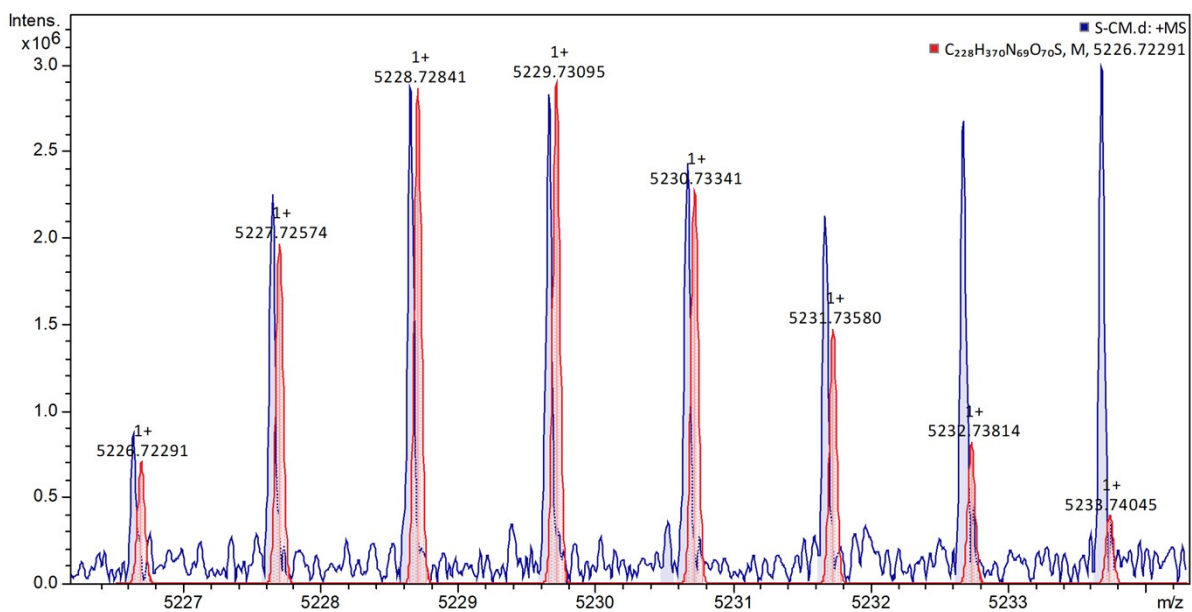

(7) Small, acid-soluble spore protein N

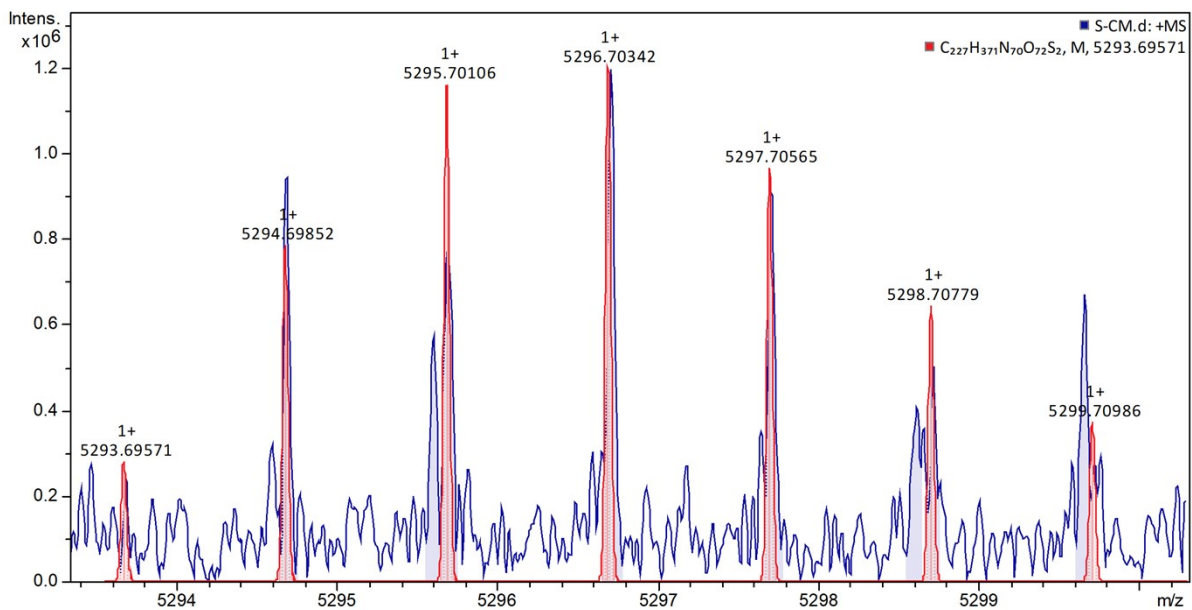

(8) Small, acid-soluble spore protein P

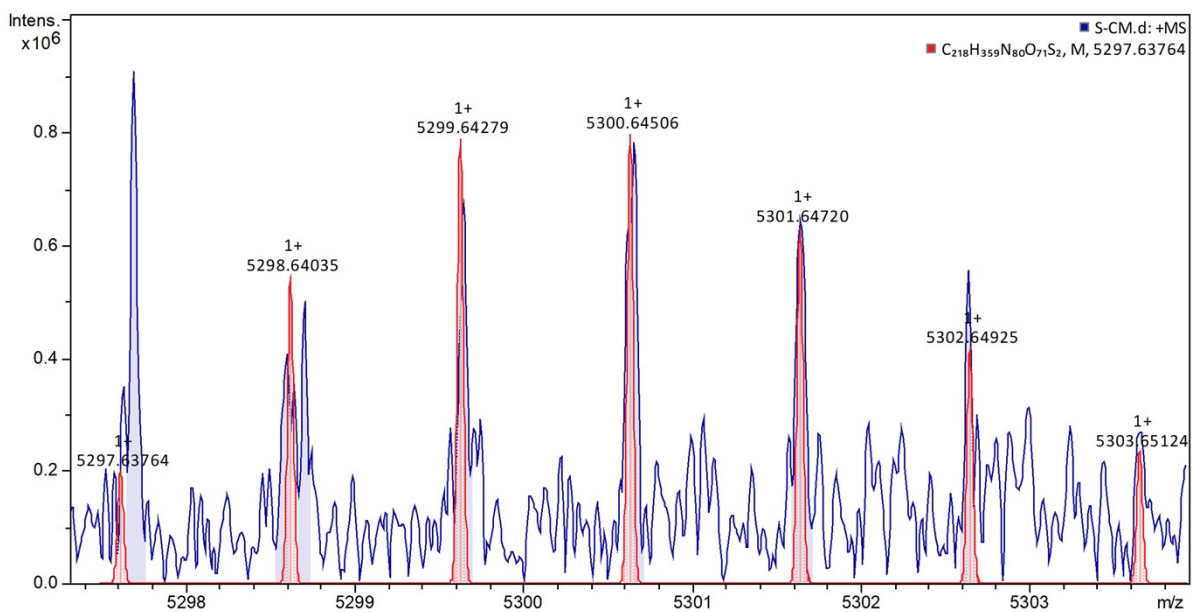

(9) Small acid-soluble spore protein O

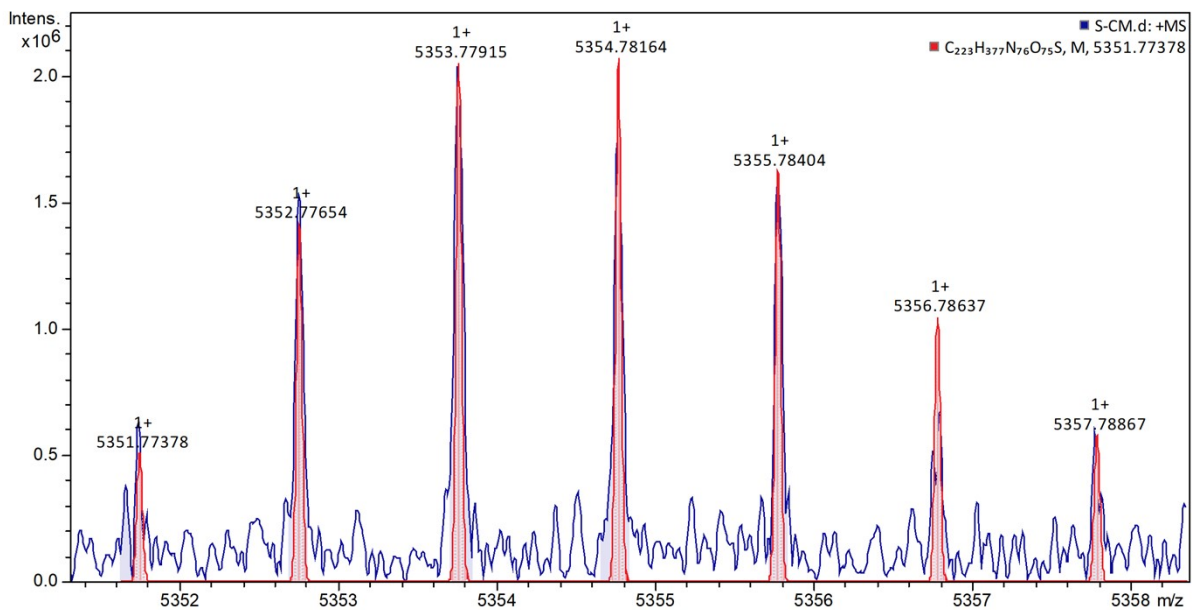

(10) Hypothetical protein

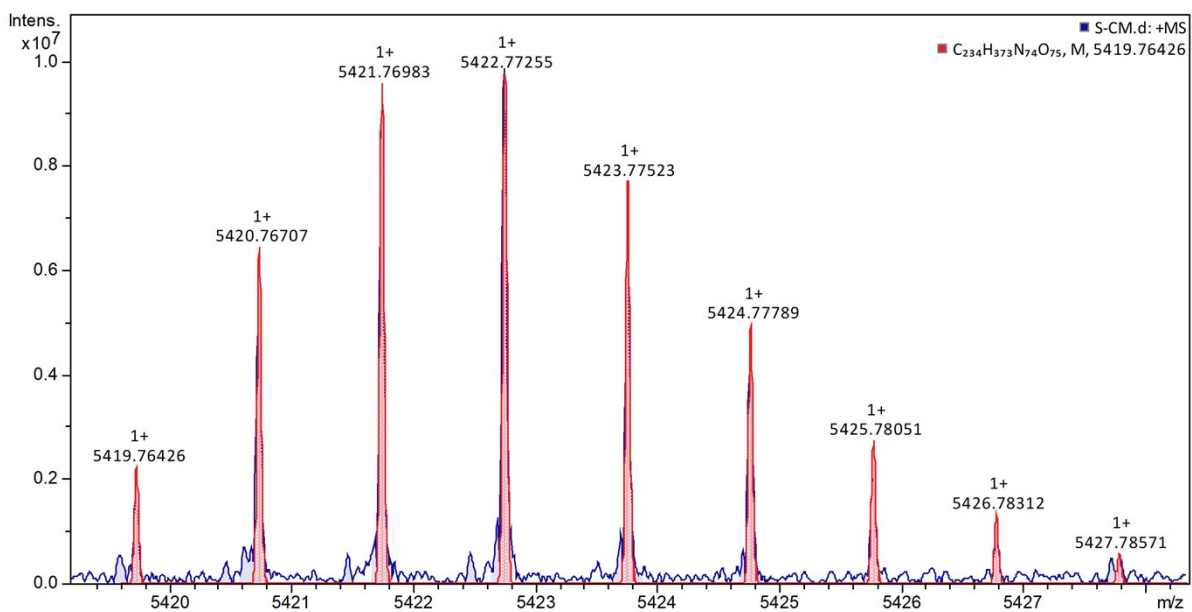

(11) Small, acid-soluble spore protein K

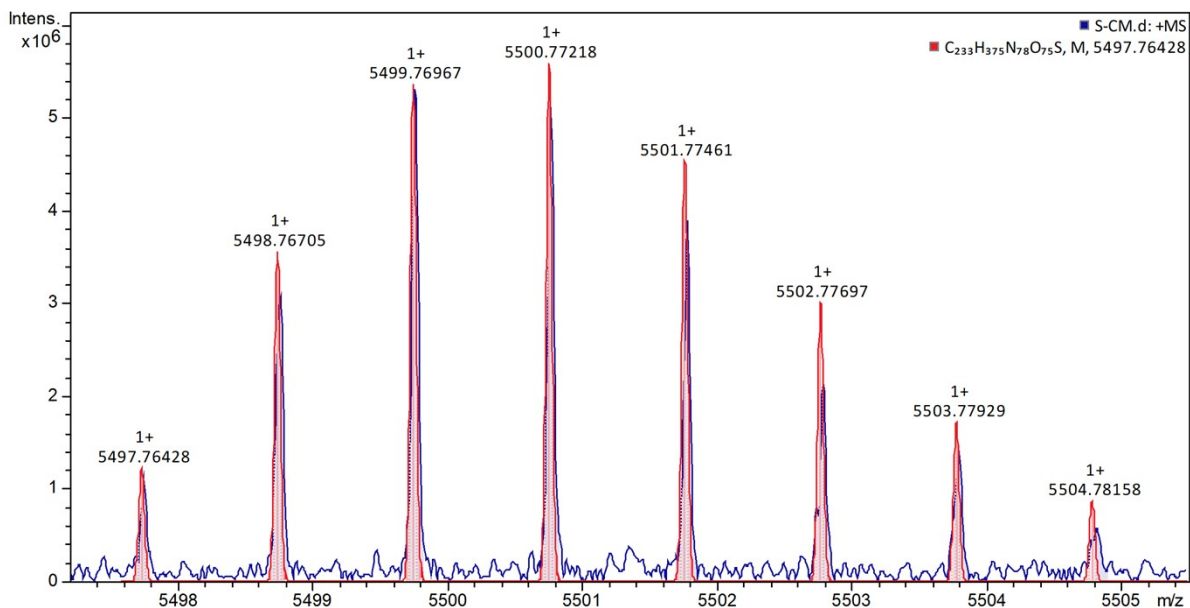

(12) DUF4025 domain-containing protein

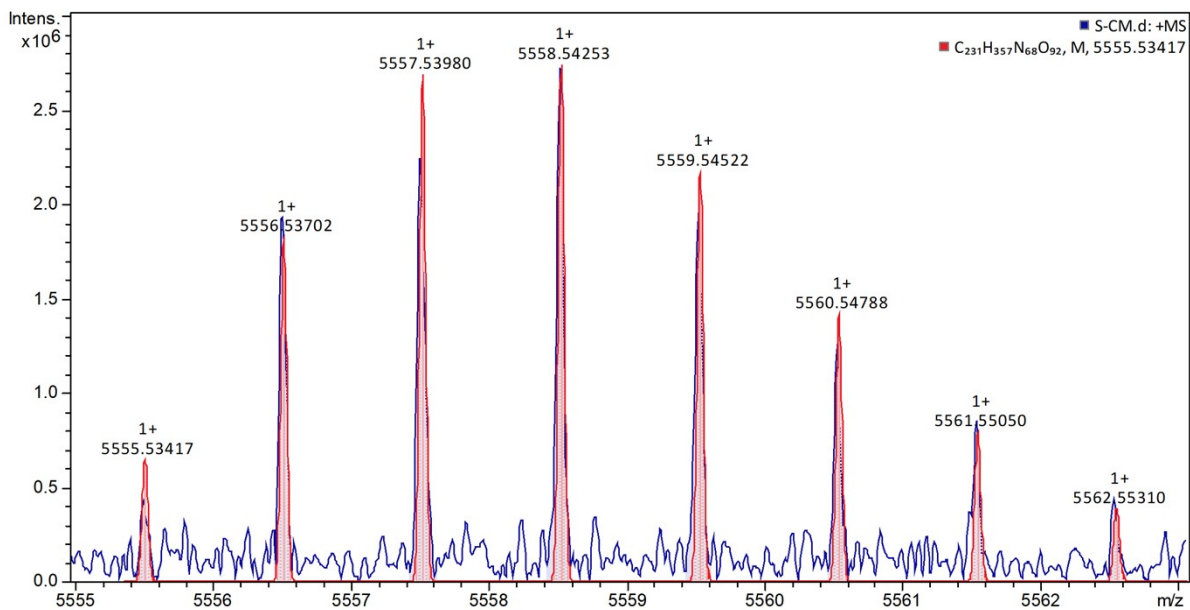

(13) YjzC family protein

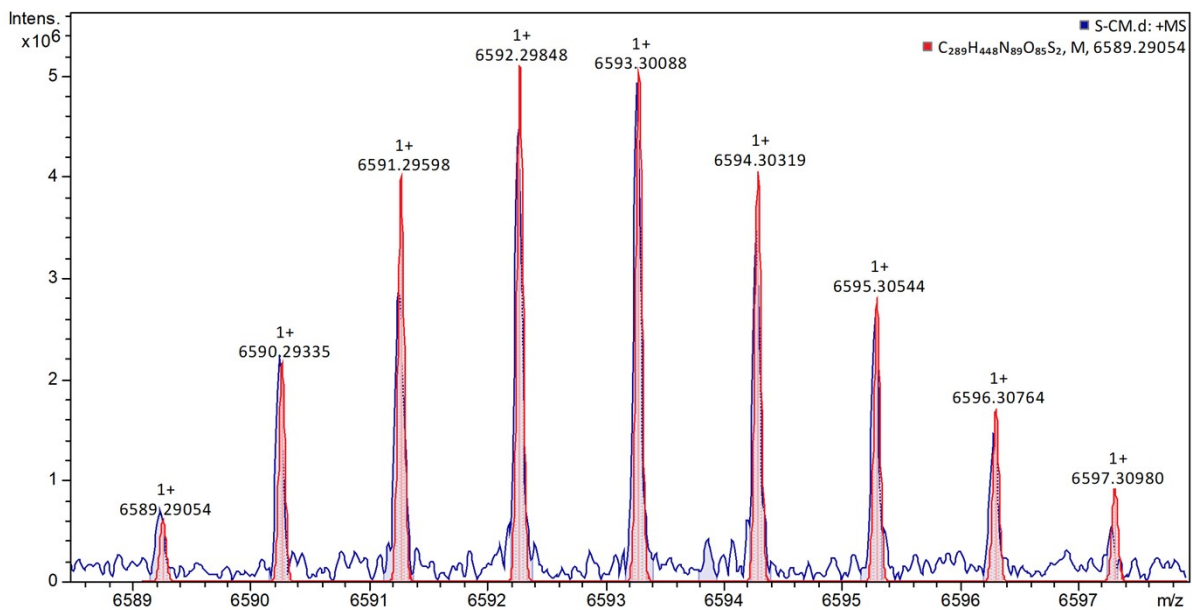

(14) Alpha/beta-type small acid-soluble spore protein

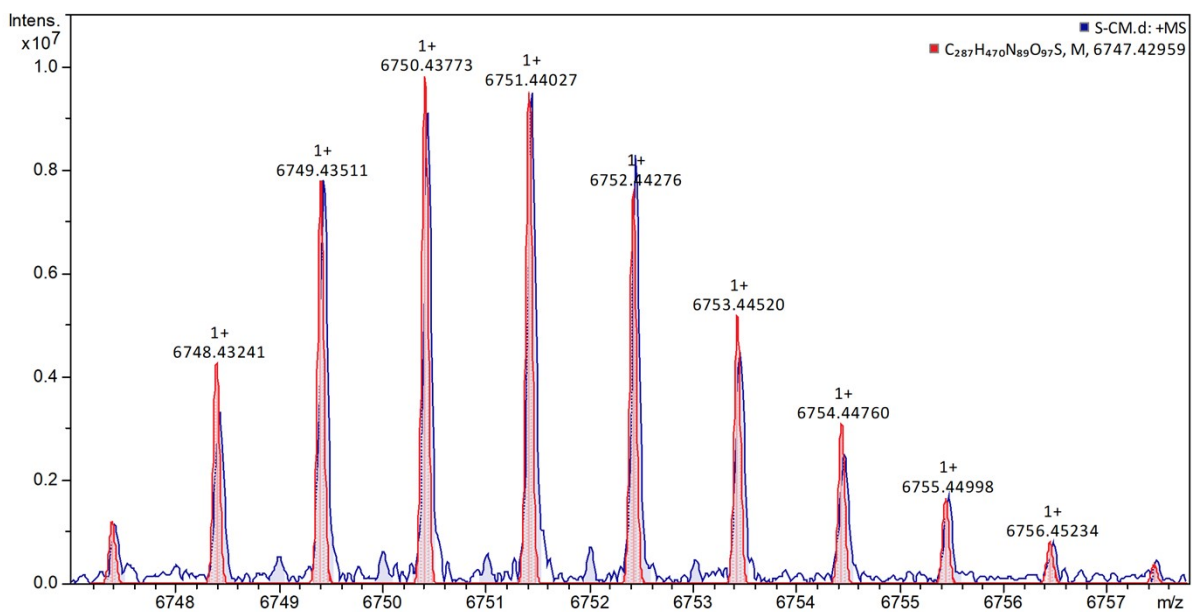

(15) Small, acid-soluble spore protein, alpha/beta type

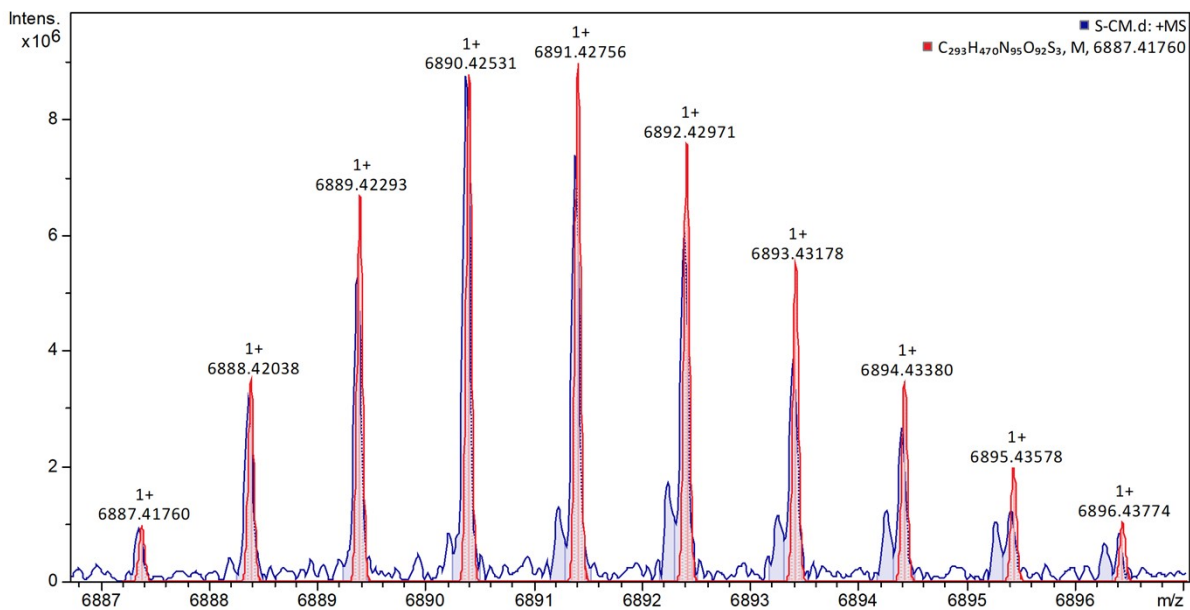

(16) Alpha/beta-type small acid-soluble spore protein

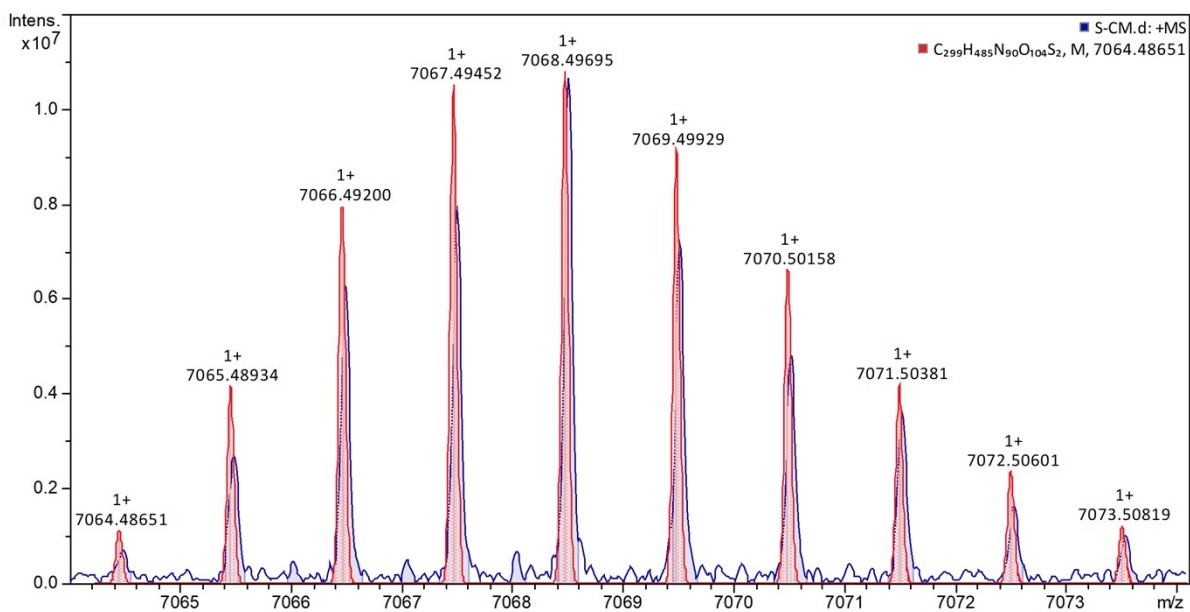



(17) YfhD family protein

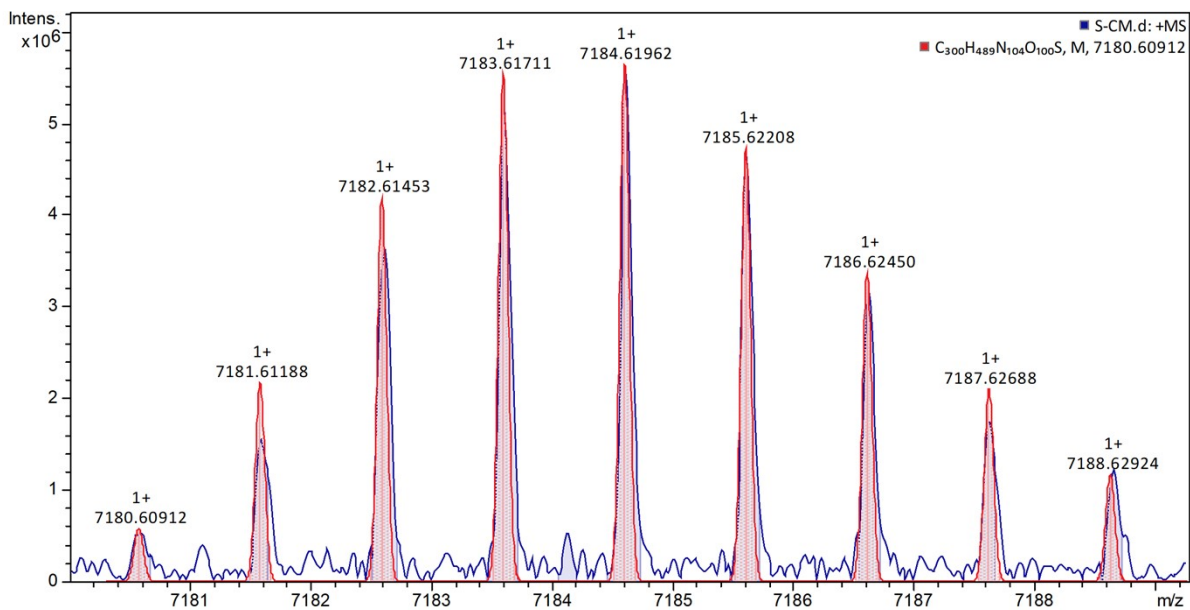

(18) Apha/beta-type small acid-soluble spore protein

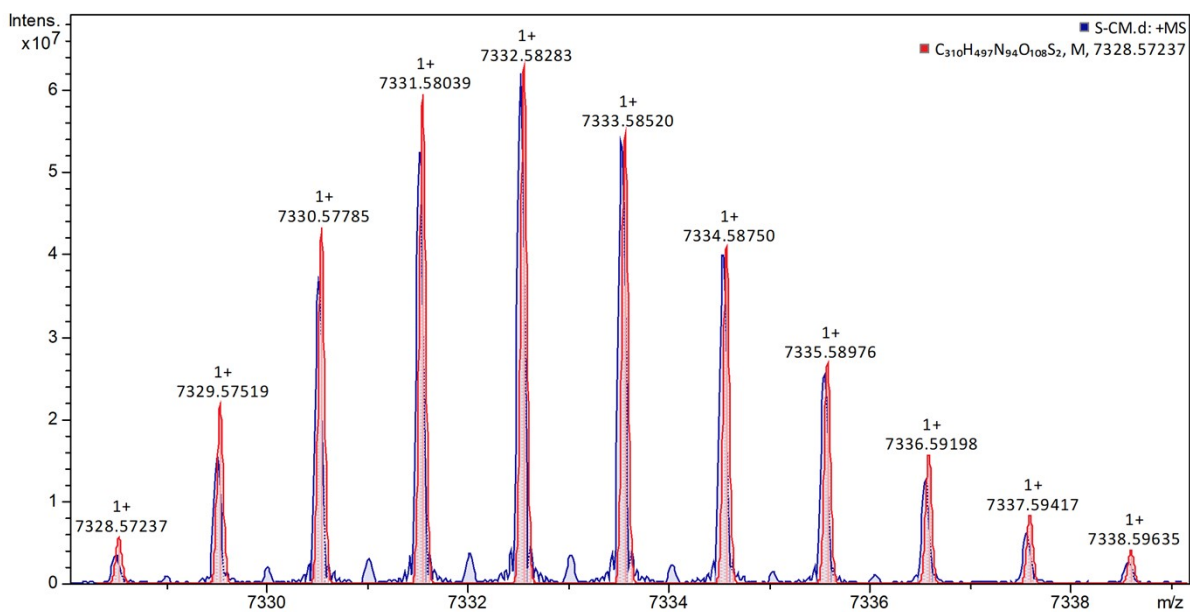

(19) Gamma-type small acid-soluble spore protein

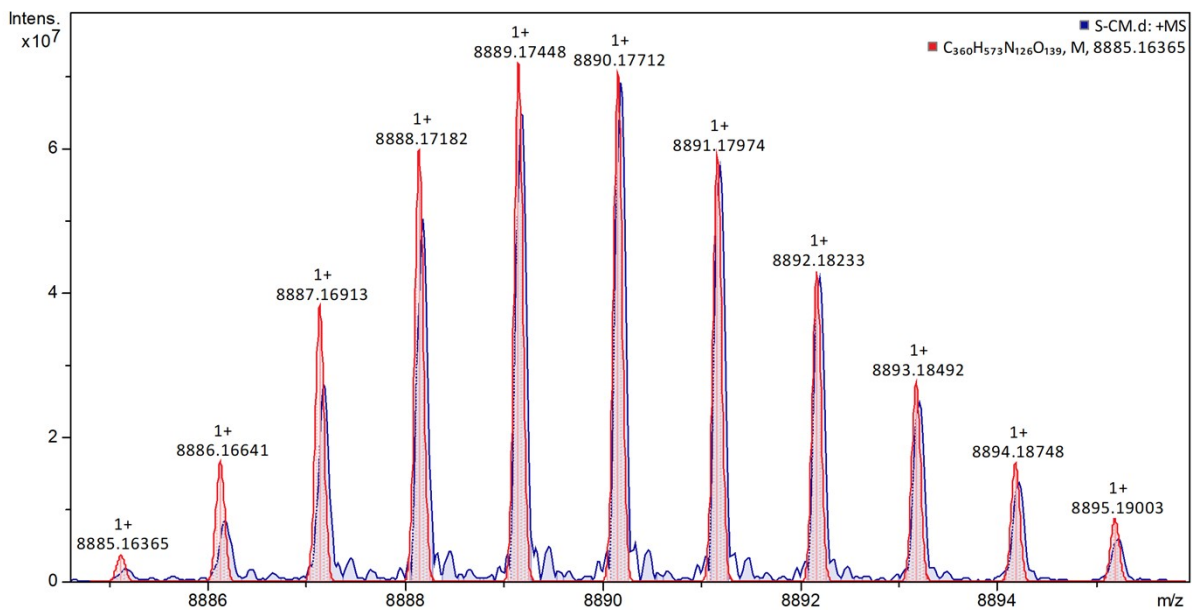

(20) Spore coat protein

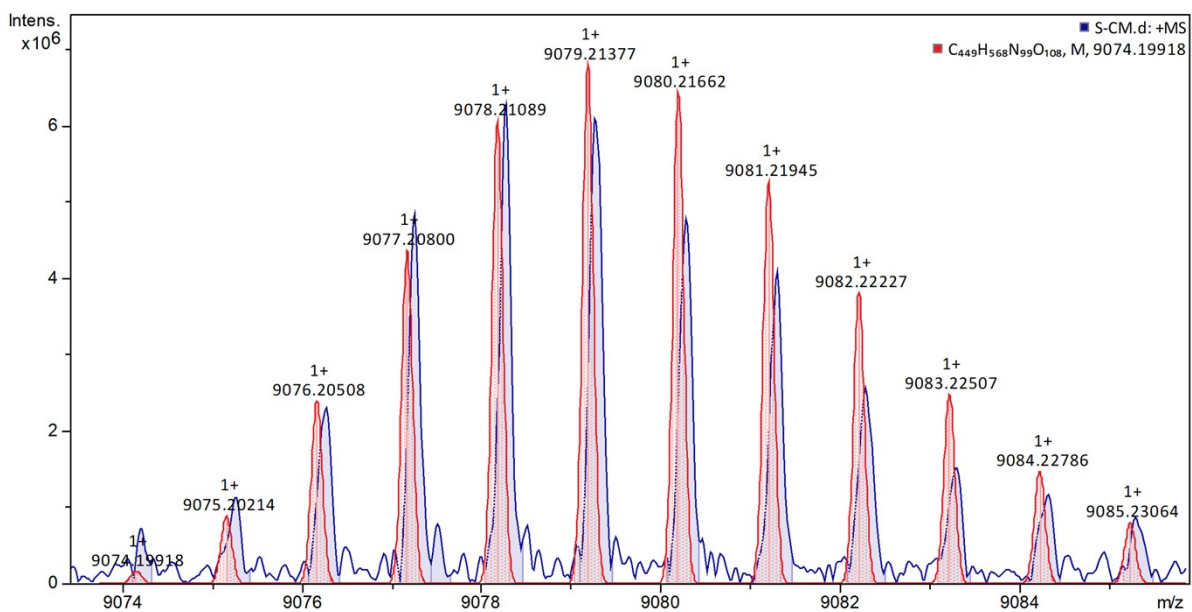

(21) Putative membrane protein

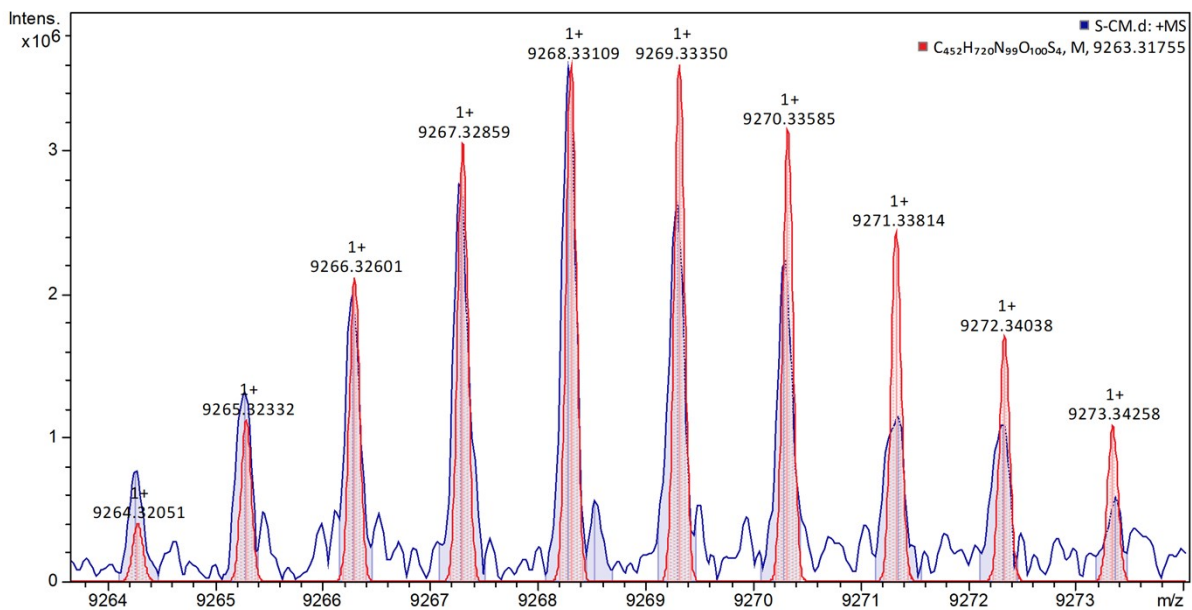

(22) Hypothetical protein

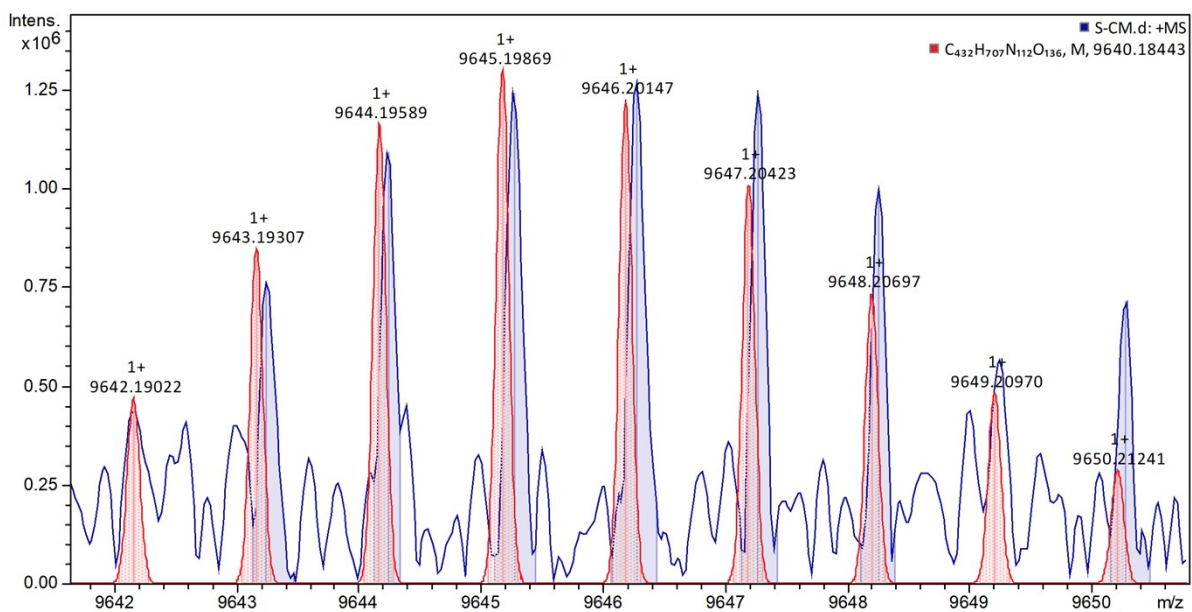

(23) Formate/nitrite transporter family protein

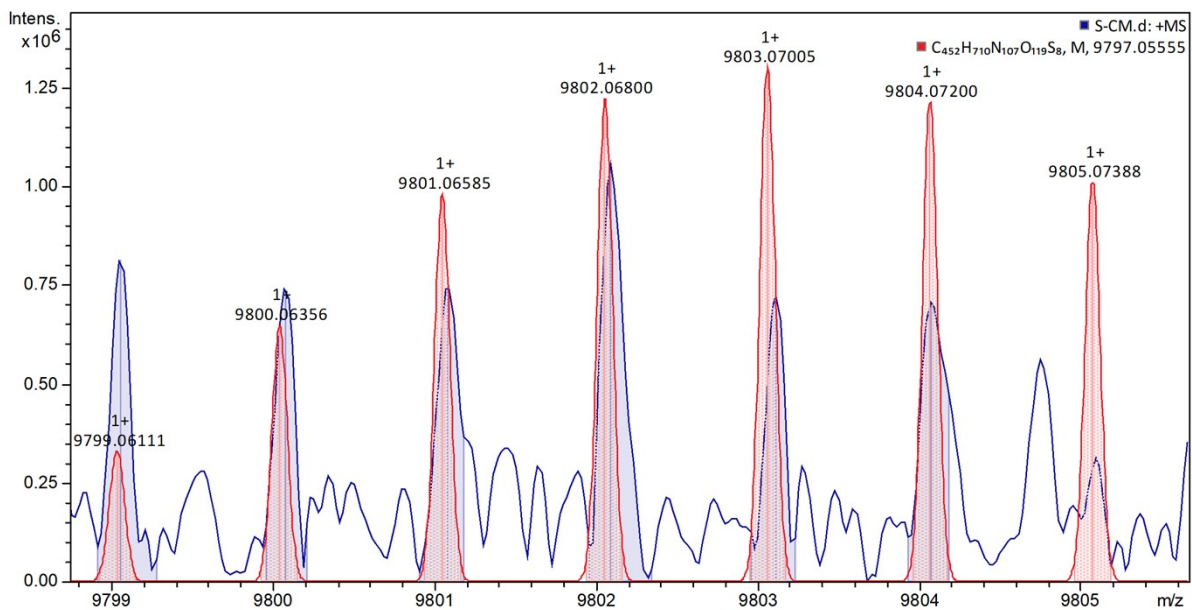

(24) Excalibur calcium-binding domain-containing protein

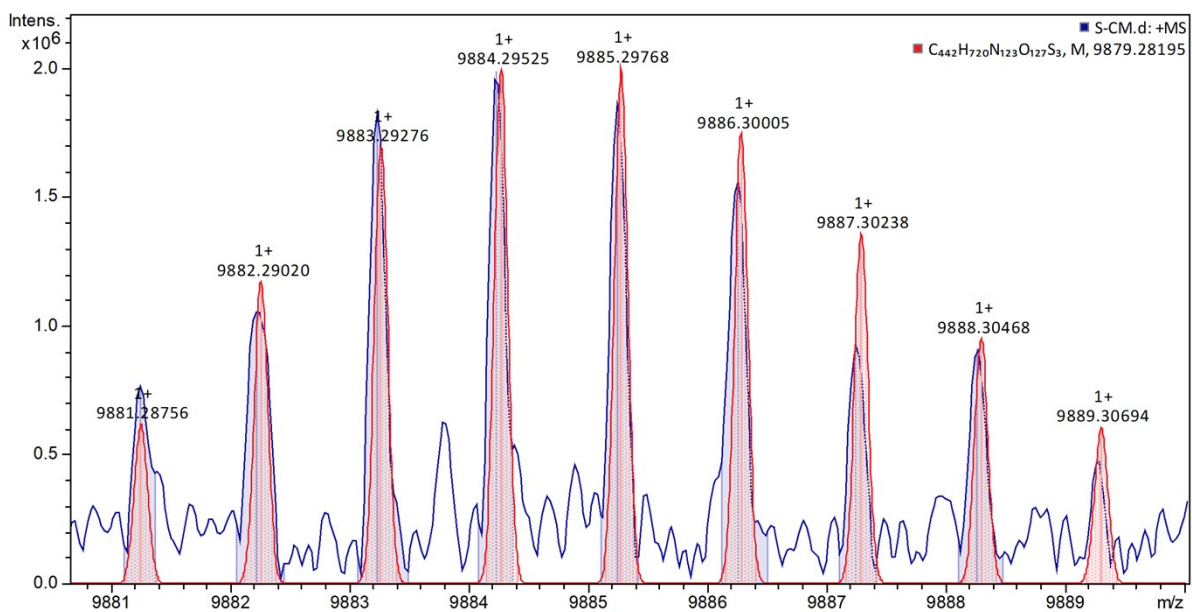

Supplement: d1an01717a1.pdf [file d1an01717a1.pdf]
